# Supplementary material for: CeO2–Co3O4 nanocomposite with oxidase-like activity for colorimetric detection of ascorbic acid
Source: Royal Society of Chemistry journal article supplement (doi:10.1039/d3ra01074k), 2023-01-01
Supplement: d3ra01074k1.pdf [file d3ra01074k1.pdf]

## CeO<sub>2</sub>-Co<sub>3</sub>O<sub>4</sub> Nanocomposites with Oxidase-like Activity for Ascorbic Acid

### Detection

Jin Yang, Shiqi Cheng, Shangying Qin, Li Huang, Yuanjin Xu and Yilin Wang\*

*School of Chemistry and Chemical Engineering, Guangxi Key Laboratory of Electrochemical Energy Materials, Guangxi University, Nanning 530004, China*

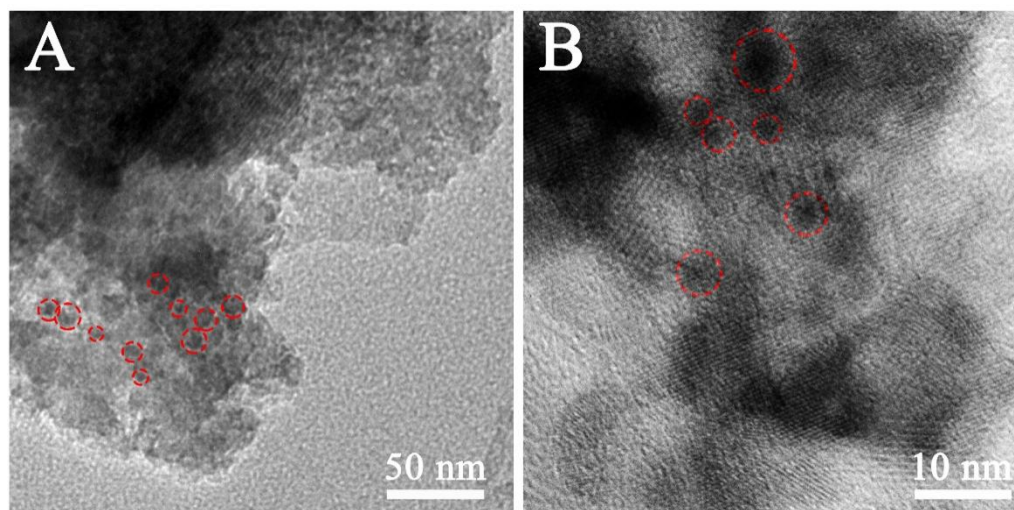

**Fig. S1** Typical TEM images of CeO<sub>2</sub>-Co<sub>3</sub>O<sub>4</sub> NC (A, B).





**Table S1.** CeO<sub>2</sub>-Co<sub>3</sub>O<sub>4</sub> NC affinity for substrate TMB ( $K_m$ ) compared to other nanomaterials.

| Nanomaterial                                        | Enzyme   | $K_m$ (mM) | $V_{max}$ ( $10^{-8}$ M s <sup>-1</sup> ) | References |
|-----------------------------------------------------|----------|------------|-------------------------------------------|------------|
|                                                     |          | TMB        | TMB                                       |            |
| CeO <sub>2</sub> NRs                                | Oxidases | 0.22       | 48                                        | 1          |
| Co <sub>3</sub> O <sub>4</sub> nanoflowers          | Oxidases | 0.047      | 4.6                                       | 2          |
| CeO <sub>2</sub> NPs                                | Oxidases | 0.80       | 30                                        | 3          |
| CeO <sub>2</sub> NPs                                | Oxidases | 0.42       | 10                                        | 4          |
| CeO <sub>2</sub> NPs                                | Oxidases | 0.14       | 60                                        | 5          |
| Co <sub>3</sub> O <sub>4</sub> NPs                  | Oxidases | 0.051      | 3.3                                       | 6          |
| CeO <sub>2</sub> NCs                                | Oxidases | 0.96       | 6                                         | 7          |
| Co <sub>3</sub> O <sub>4</sub> nanosheets           | Oxidases | 0.35       | 0.5                                       | 8          |
| HPR                                                 | *        | 0.434      | 10                                        | 9          |
| CeO <sub>2</sub> -Co <sub>3</sub> O <sub>4</sub> NC | Oxidases | 0.15       | 2.7                                       | This work  |

**Table S2.** Comparison of analytical performance of AA with different materials.

| Material                                             | Analytical method | Linear range ( $\mu$ M) | Detection limit ( $\mu$ M) | Reference s |
|------------------------------------------------------|-------------------|-------------------------|----------------------------|-------------|
| Fe-Mn nanozymes                                      | Colorimetric      | 8-56                    | 0.88                       | 10          |
| Ag NPs                                               | Colorimetric      | 0.4-5                   | 0.13                       | 11          |
| PSS-rGO                                              | Colorimetric      | 0.8-60                  | 0.15                       | 12          |
| WSCN                                                 | Colorimetric      | 0-14                    | 0.50                       | 13          |
| CuO/Pt nanocomposites                                | Colorimetric      | 1-600                   | 0.79                       | 14          |
| Au/Cu NRs                                            | Colorimetric      | 0-2000                  | 25                         | 15          |
| Pt/ZnCo <sub>2</sub> O <sub>4</sub>                  | Colorimetric      | 1-15                    | 0.46                       | 16          |
| CuCo <sub>2</sub> O <sub>4</sub> microspheres        | Colorimetric      | 1-10                    | 0.57                       | 17          |
| CDs/Fe <sub>3</sub> O <sub>4</sub> hybrid nanofibers | Colorimetric      | 1-30                    | 0.28                       | 18          |
| CeO <sub>2</sub> -Co <sub>3</sub> O <sub>4</sub> NC  | Colorimetric      | 1-500                   | 0.25                       | This work   |

## References

1. L. Huang, W. Zhang, K. Chen, W. Zhu, X. Liu, R. Wang, X. Zhang, N. Hu, Y. Suo and J. Wang, *Chem. Eng. J.*, 2017, **330**, 746-752.
2. X. Liu, L. Yan, H. Ren, Y. Cai, C. Liu, L. Zeng, J. Guo and A. Liu, *Biosens. Bioelectron.*, 2020, **165**, 112342.
3. W. Qin, L. Su, C. Yang, Y. Ma, H. Zhang and X. Chen, *J Agric. Food Chem.*, 2014, **62**, 5827-5834.

4. A. Asati, S. Santra, C. Kaittanis, S. Nath and J. M. Perez, *Angew. Chem., Int. Ed.*, 2009, **48**, 2308-2312.
5. H. Cheng, S. Lin, F. Muhammad, Y.-W. Lin and H. Wei, *ACS Sens.*, 2016, **1**, 1336-1343.
6. Y. Zhao, Y. Wang, A. Mathur, Y. Wang, V. Maheshwari, H. Su and J. Liu, *Nanoscale*, 2019, **11**, 17841-17850.
7. M. Zhu, Y. Wen, S. Song, A. Zheng, J. Li, W. Sun, Y. Dai, K. Yin and L. Sun, *Nanoscale*, 2020, **12**, 19104-19111.
8. R. D. Isho, N. M. Sher Mohammad and K. M. Omer, *Anal. Biochem.*, 2022, **654**, 114818.
9. C. Yuan, X. Qin, Y. Xu, Q. Jing, R. Shi and Y. Wang, *Microchem. J.*, 2020, **159**, 105365.
10. Y. Han, L. Luo, L. Zhang, Y. Kang, H. Sun, J. Dan, J. Sun, W. Zhang, T. Yue and J. Wang, *LWT*, 2022, **154**, 112821.
11. F. Li, Y. Yu, F. Xiao, H. Liang, C. Liu, P. Fan and S. Yang, *Luminescence*, 2020, **35**, 1084-1091.
12. J. Chen, J. Ge, L. Zhang, Z. Li, J. Li, Y. Sun and L. Qu, *Microchim. Acta*, 2016, **183**, 1847-1853.
13. M. Chen, R. Lu and A. Yu, *Mater. Lett.*, 2020, **263**, 127253.
14. X. Wang, Q. Han, S. Cai, T. Wang, C. Qi, R. Yang and C. Wang, *Analyst.*, 2017, **142**, 2500-2506.
15. S. Xu, X. Dong, S. Chen, Y. Zhao, G. Shan, Y. Sun, Y. Chen and Y. Liu, *Sens. Actua. B.*, 2019, **281**, 375-382.
16. D. Yin, X. Cao, X. Liu, Z. Yang, Z. Liu, D. Wang, Q. Liu, X. Zhang and X. Zhang, *New J. Chem.*, 2020, **44**, 12002-12008.
17. S. Han, X. Chen, Y. Fan, Y. Zhang, Z. Yang, X. Kong, Z. Liu, Q. Liu and X. Zhang, *New J. Chem.*, 2021, **45**, 2030-2037.
18. S. Chen, M. Chi, Z. Yang, M. Gao, C. Wang and X. Lu, *Inorg Chem Front.*, 2017, **4**, 1621-1627.
